# Supplementary material for: Pseudo-Polymorphism in 2-Pyridylmethoxy Cone Derivatives of <em>p-tert</em>-butylcalix[4]arene and P-Tert-Butylhomooxacalix[<em>n</em>]arenes
Source: Preprints.org preprint supplement (doi:10.20944/preprints202402.0887.v1), 2024-02-16
Supplement: Supplementary file 1 [file supplementary]

**Pseudo-polymorphism in 2-pyridylmethoxy cone derivatives of**

***p*-*tert*-butylcalix[4]arene and *p*-*tert*-butylhomooxacalix[*n*]arenes**

Siddharth Joshi,a Neal Hickey,a Paula M. Marcos,bc Silvano Geremiaa*

aCentre of Excellence in Biocrystallography, Department of Chemical and Pharmaceutical Sciences, University of Trieste, via L. Giorgieri 1, 34127 Trieste, Italy

bCentro de Química Estrutural, Institute of Molecular Sciences, Faculdade de Ciências, Universidade de Lisboa, Edifício C8, 1749-016 Lisboa, Portugal.

cFaculdade de Farmácia da Universidade de Lisboa, Av. Prof. Gama Pinto, 1649-003 Lisboa, Portugal

**Corresponding author:**

Silvano Geremia

E-mail: sgeremia@units.it

Table S1a: Summary of the various crystalline forms of **PyC4, PyHOC4** and **PyH3OC3** obtained under various crystallisation conditions.

| **PyC4** | | | | | | | | |
| --- | --- | --- | --- | --- | --- | --- | --- | --- |
| **PyC4-MeOH-α** | **PyC4-H2O-α** | | **PyC4-MeOH-β** | **PyC4⸦ACN-MeOH** | | **PyC4⸦ACN-H2O** | **PyC4** | |
| MeOH + a/d | MeOH + d | | MeOH + CHCl3 + c | MeOH + MeCN + a/b | | DMSO + MeCN + b | MeOH + Toluene + f | |
| MeOH + CHCl3 + b |  | | MeOH + Hexane + e | MeOH+MeCN+THF+e | |  | MeOH + Hexane + a | |
| MeOH + Hexane + b/c |  | |  |  | |  |  | |
|  |  | |  |  | |  |  | |
| **PyHOC4** | | | | | | | |
| **PyHOC4-DMSO** | | **PyHOC4-MeCN-MeOH** | | | **PyHOC4-Hexane** | | |
| DMSO + f | | MeOH + MeCN + b | | | MeOH + Hexane + f | | |

| **PyH3OC3** | |
| --- | --- |
| **PyHO3C3** | **PyHO3C3-H2O-MeOH** |
| MeOH + CHCl3 + a/c/d/e | MeOH + CHCl3 + b |
| MeCN + b/c |  |
| MeOH + b |  |
| MeOH + MeCN + a |  |
| DMSO + b |  |

a La(NO3)3.6H2O; b Er(NO3)3.5H2O; c La(triflate); d Gd(NO3)3.6H2O; e Yb(triflate; f Tb(triflate)

Table S2. Crystal data and structure refinements for **PyC4** pseudo-polymorphs.

|  | **PyC4-MeOH-α** | **PyC4-H2O-α** | **PyC4-MeOH-β** | **PyC4⸦MeCN-MeOH** | **PyC4⸦MeCN-H2O** | **PyC4** |
| --- | --- | --- | --- | --- | --- | --- |
| Empirical formula | C68.2 H76.8 O4.2 N4 | C68 H76.8 O4.4 N4 | C68.75 H79 O4.75 N4 | C71 H83 O5 N5 | C70 H79.4 N5 O4.2 | C68 H76 O4 N4 |
| Formula weight | 1019.73 | 1020.53 | 1037.35 | 1086.42 | 1057.99 | 1013.32 |
| Temp. (K) | 100(2) | 100(2) | 100(2) | 100(2) | 100(2) | 100(2) |
| Wavelength (Ǻ) | 0.7 | 0.7 | 0.7 | 0.7 | 0.7 | 0.7 |
| Crystal system | Monoclinic | Monoclinic | Triclinic | Monoclinic | Triclinic | Monoclinic |
| Space group | P 21/c | P 21/c | P -1 | P21 | P -1 | P 21/n |
| Unit cell  Dimensions (Ǻ. °) | a = 12.004(4)  b = 12.090(8)  c = 40.691(5)  = 90  = 95.857(13)  = 90 | a = 12.005(5)  b = 12.121(1)  c = 40.565(2)  = 90  = 95.98(2)  = 90 | a = 10.410(4)  b = 23.014(9)  c = 24.874(10)  = 95.813(8)  = 90.17(3)  = 97.56(3) | a = 13.936(2)  b = 15.260(1)  c = 14.125(2)  = 90  = 92.794(19)  = 90 | a = 13.239(2)  b = 14.358(1)  c = 18.297(2)  = 95.419(8)  = 100.656(11)  = 117.079(9) | a  b  c  = 90  = 108.878(12)  = 90 |
| Volume (Ǻ3) | 5875(2) | 5871(2) | 5876(4) | 3000.3(6) | 2979.3(6) | 5815(4) |
| Z | 4 | 4 | 4 | 2 | 2 | 4 |
| ** calcd (g/cm3) | 1.153 | 1.155 | 1.173 | 1.203 | 1.179 | 1.157 |
| ** (mm–1) | 0.068 | 0.069 | 0.070 | 0.072 | 0.070 | 0.071 |
| F(000) | 2190 | 2192 | 2230 | 1168 | 1136 | 2176 |
| Reflections collected | 92155 | 108677 | 26719 | 53761 | 55796 | 106058 |
| Independent reflections | 16083 | 15795 | 14199 | 16697 | 15954 | 16910 |
| parameters/ restr. | 747/8 | 747/0 | 1465/0 | 751/1 | 748/0 | 698/0 |
| GOOF | 1.0072 | 1.049 | 1.032 | 1.043 | 1.043 | 1.047 |
| *R* all data | 0.0633 | 0.0535 | 0.1459 | 0.0417 | 0.0522 | 0.0631 |
| *R* [I>2σ(I)] | 0.0616 | 0.0444 | 0.0966 |  | 0.0479 | 0.0585 |
| *wR* all data | 0.1664 | 0.1238 | 0.2930 | 0.1131 | 0.1333 | 0.1666 |
| *wR* [I>2σ(I)] | 0.1646 | 0.1171 | 0.2538 | 0.1119 | 0.1295 | 0.1614 |
| Largest Diff. peak (e Å-3) | 0.633/-0.350 | 0.351/-0.276 | 0.450/-0.357 | 0.336/-0.319 | 0.674/-0.358 | 0.592/-0.402 |
| CCDC code | 2331929 | 2331930 | 2331931 | 2331932 | 2331933 | 2331934 |

Table S3. Crystal data and structure refinements for **PyHOC4** pseudo-polymorphs.

|  | **PyHOC4-DMSO** | **PyHOC4⸦MeCN-MeOH** | **PyHOC4-Hexane** |
| --- | --- | --- | --- |
| Empirical formula | C70.72 H81.68 N4 O5.86 S0.86 | C71.80 H84.20 N5 O5.80 | C78 H99 N4 O5 |
| Formula weight | 1110.73 | 1110.04 | 1172.61 |
| Temperature (K) | 100(2) | 100(2) | 100(2) |
| Wavelength (Ǻ) | 0.7 | 0.7 | 0.7 |
| Crystal system | Triclinic | Triclinic | Triclinic |
| Space group | P -1 | P -1 | P -1 |
| Unit cell  Dimensions (Ǻ. °) | a = 20.98(2)  b = 22.476(18)  c = 28.52(3)  = 72.25(2)  = 81.425(15)  = 89.765(16) | a = 13.969 (11)  b = 14.823(8)  c = 15.292(5)  = 84.06(3)  = 83.01(4)   = 87.134(16) | a = 11.686 (5)  b = 16.604(2)  c = 17.957(3)  = 88.99(3)  = 86.252(5)   = 77.253(5) |
| Volume (Ǻ3) | 12655(22) | 3124(3) | 3391.1(15) |
| Z | 8 | 2 | 2 |
| ** calcd (g/cm3) | 1.164 | 1.18 | 1.148 |
| ** (mm–1) | 0.098 | 0.075 | 0.068 |
| F(000) | 4758 | 1193 | 1272 |
| Reflections collected | 101598 | 20556 | 123826 |
| Independent reflections | 29067 | 6399 | 19724 |
| parameters/ restr. | 2802/2286 | 714/0 | 801/0 |
| GOOF | 1.025 | 1.062 | 1.032 |
| *R* all data | 0.2285 | 0.1568 | 0.0673 |
| *R* [I>2σ(I)] | 0.1659 | 0.1326 | 0.0643 |
| *wR* all data | 0.5018 | 0.4251 | 0.1891 |
| *wR* [I>2σ(I)] | 0.4387 | 0.3876 | 0.1857 |
| Largest Diff. peak/ hole (e Å-3) | 0.841/-0.646 | 0.517/-0.325 | 1.047/-0.598 |
| CCDC code | 2331935 | 2331936 | 2331937 |

Table S4. Crystal data and structure refinements for **PyHO3C3** pseudo-polymorphs

|  | **PyHO3C3** | **PyHO3C3-H2O-MeOH** |
| --- | --- | --- |
| Empirical formula | C54 H63 N3 O6 | C55 H75 N3 O11 |
| Formula weight | 850.07 | 954.18 |
| Temperature (K) | 100(2) | 100(2) |
| Wavelength (Ǻ) | 0.7 | 0.7 |
| Crystal system | Monoclinic | Monoclinic |
| Space group | P 21/c | P 21/c |
| Unit cell  Dimensions (Ǻ. °) | a = 24.022(3)  b = 10.7210(14)  c = 19.415(5)  = 90  = 111.667(7)  = 90 | a = 19.430(19)  b = 14.376(3)  c = 19.605(8)  = 90  = 106.84(5)  = 90 |
| Volume (Ǻ3) | 4646.9(14) | 5241(6) |
| Z | 4 | 4 |
| ** calcd (g/cm3) | 1.215 | 1.209 |
| ** (mm–1) | 0.075 | 0.080 |
| F(000) | 1824 | 2056 |
| Reflections collected | 85480 | 96321 |
| Independent reflections | 13548 | 15397 |
| Data/parameters/ restr. | 712/1570 | 659/0 |
| GOOF | 1.091 | 1.020 |
| *R* all data | 0.1104 | 0.0816 |
| *R* [I>2σ(I)] | 0.0883 | 0.0567 |
| *wR* all data | 0.2571 | 0.1605 |
| *wR* [I>2σ(I)] | 0.2376 | 0.1434 |
| Largest Diff. peak/ hole (e Å-3) | 0.699/-0.630 | 0.515/-0.296 |
| CCDC code | 2331938 | 2331939 |


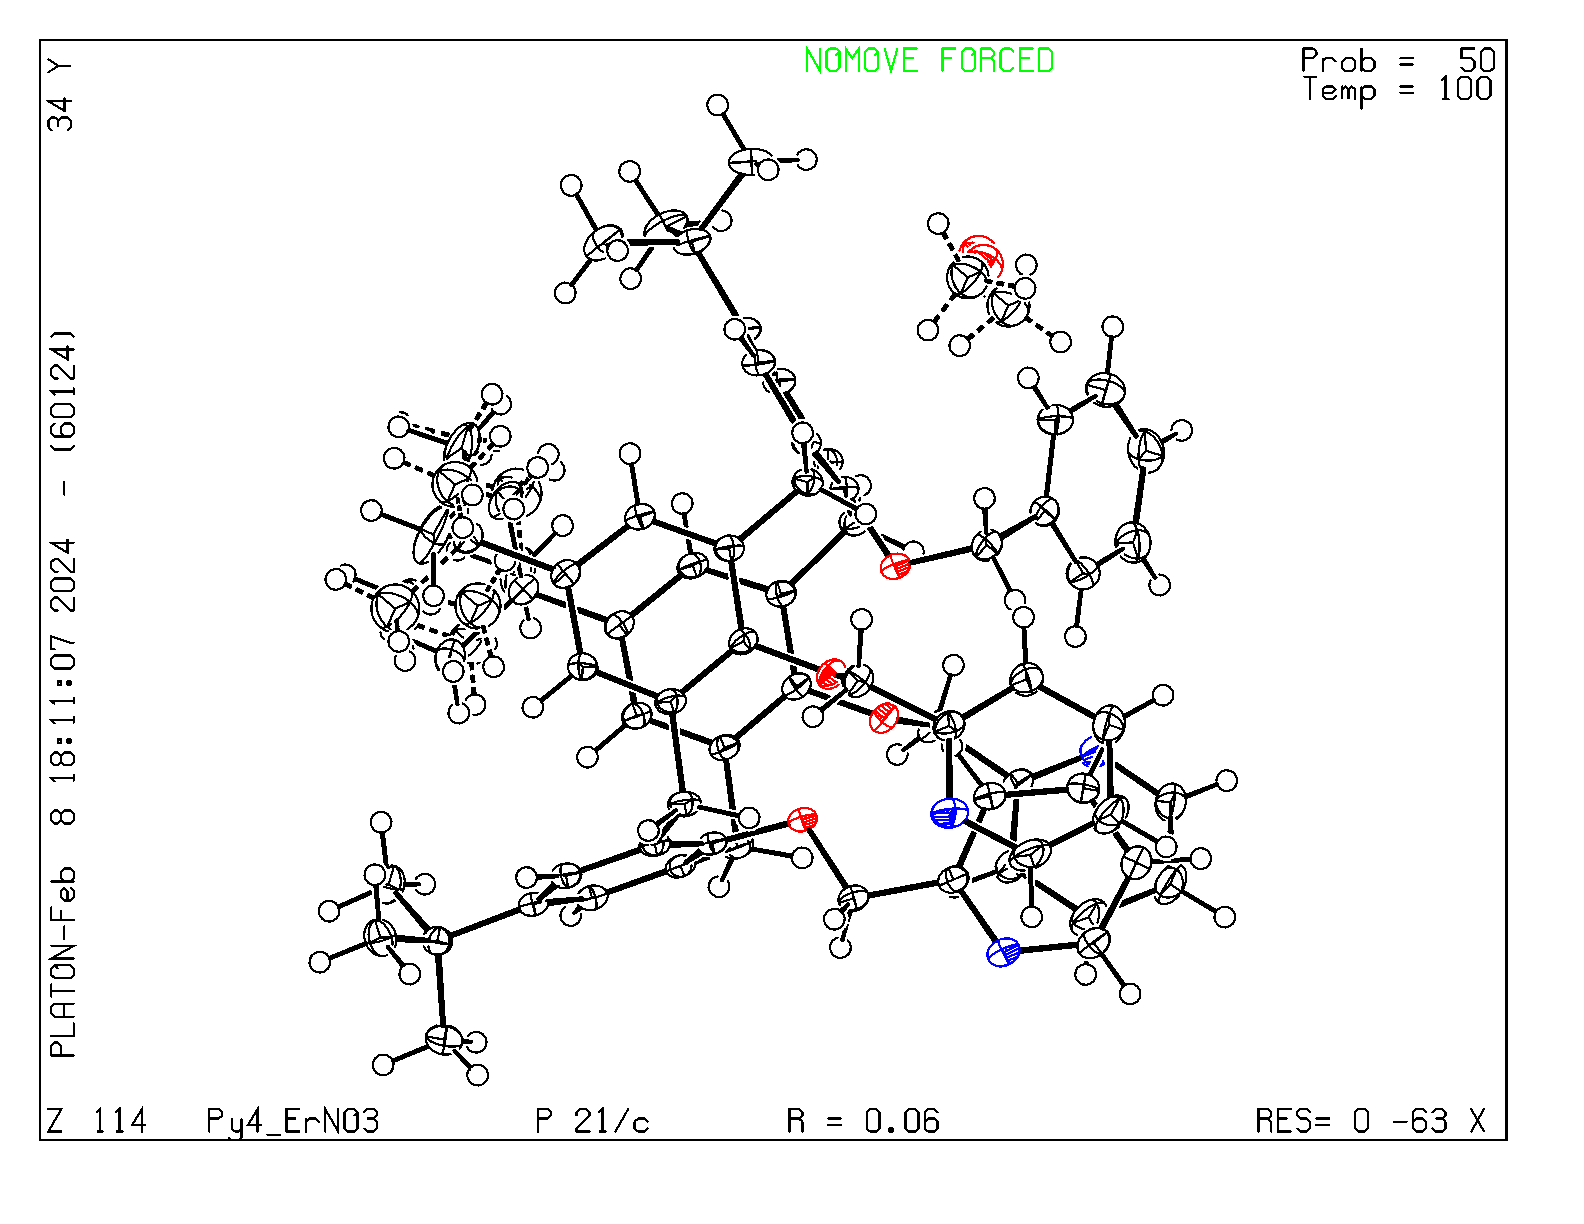


Figure S1. ORTEP drawing of the asymmetric unit for the **PyC4-MeOH-α** crystal form.


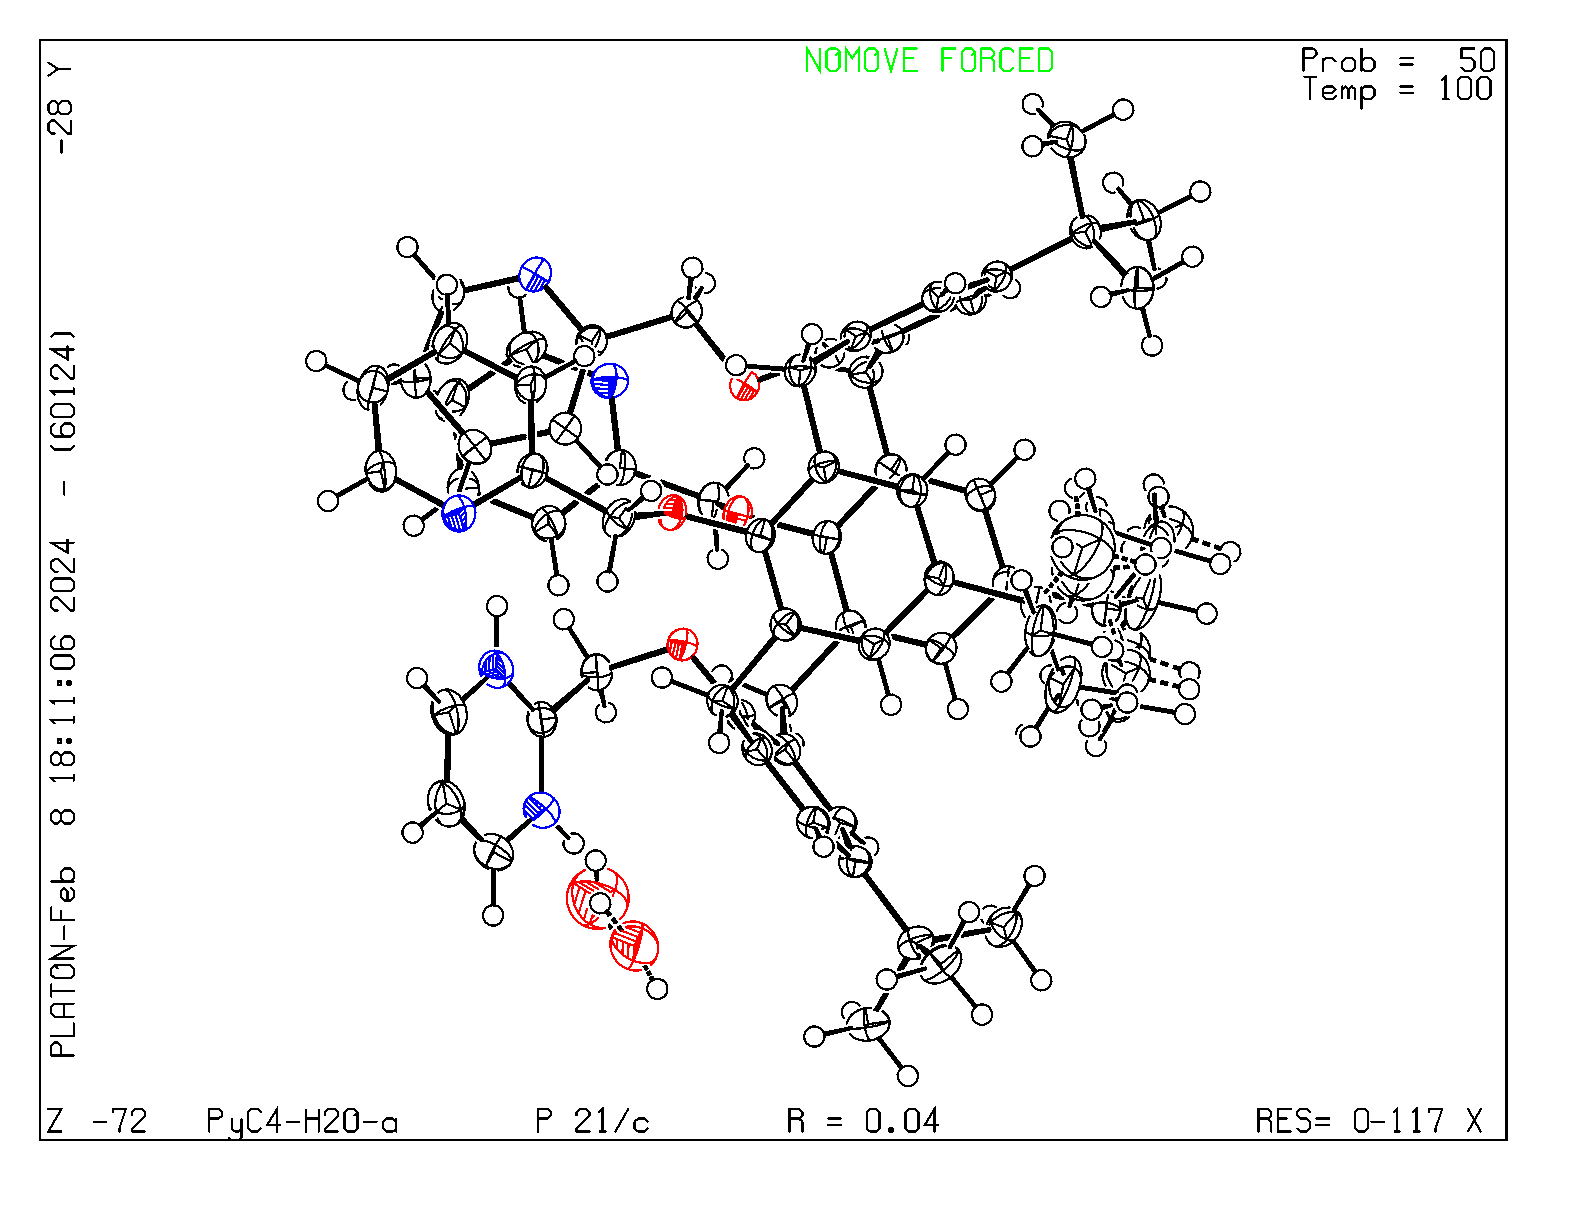


Figure S2. ORTEP drawing of the asymmetric unit for the **PyC4-H2O-α** crystal form.


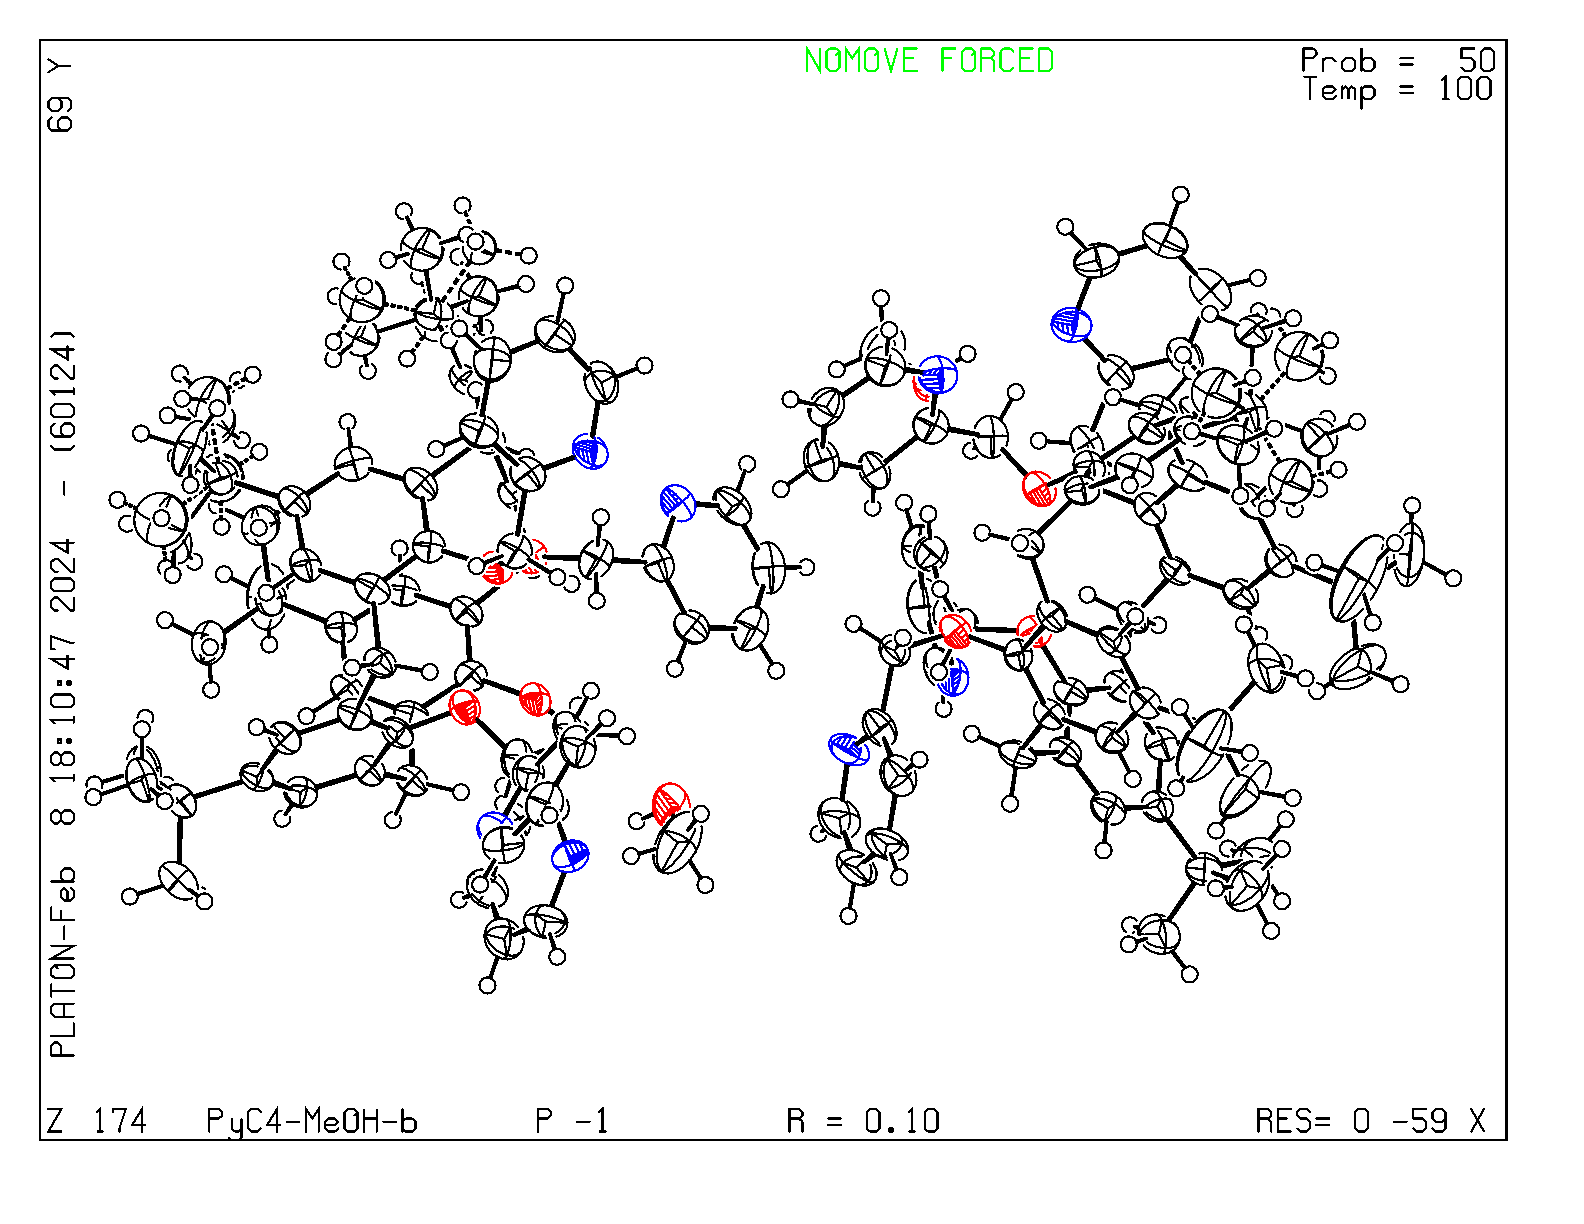


Figure S3. ORTEP drawing of the asymmetric unit for the **PyC4-MeOH-β** crystal form.


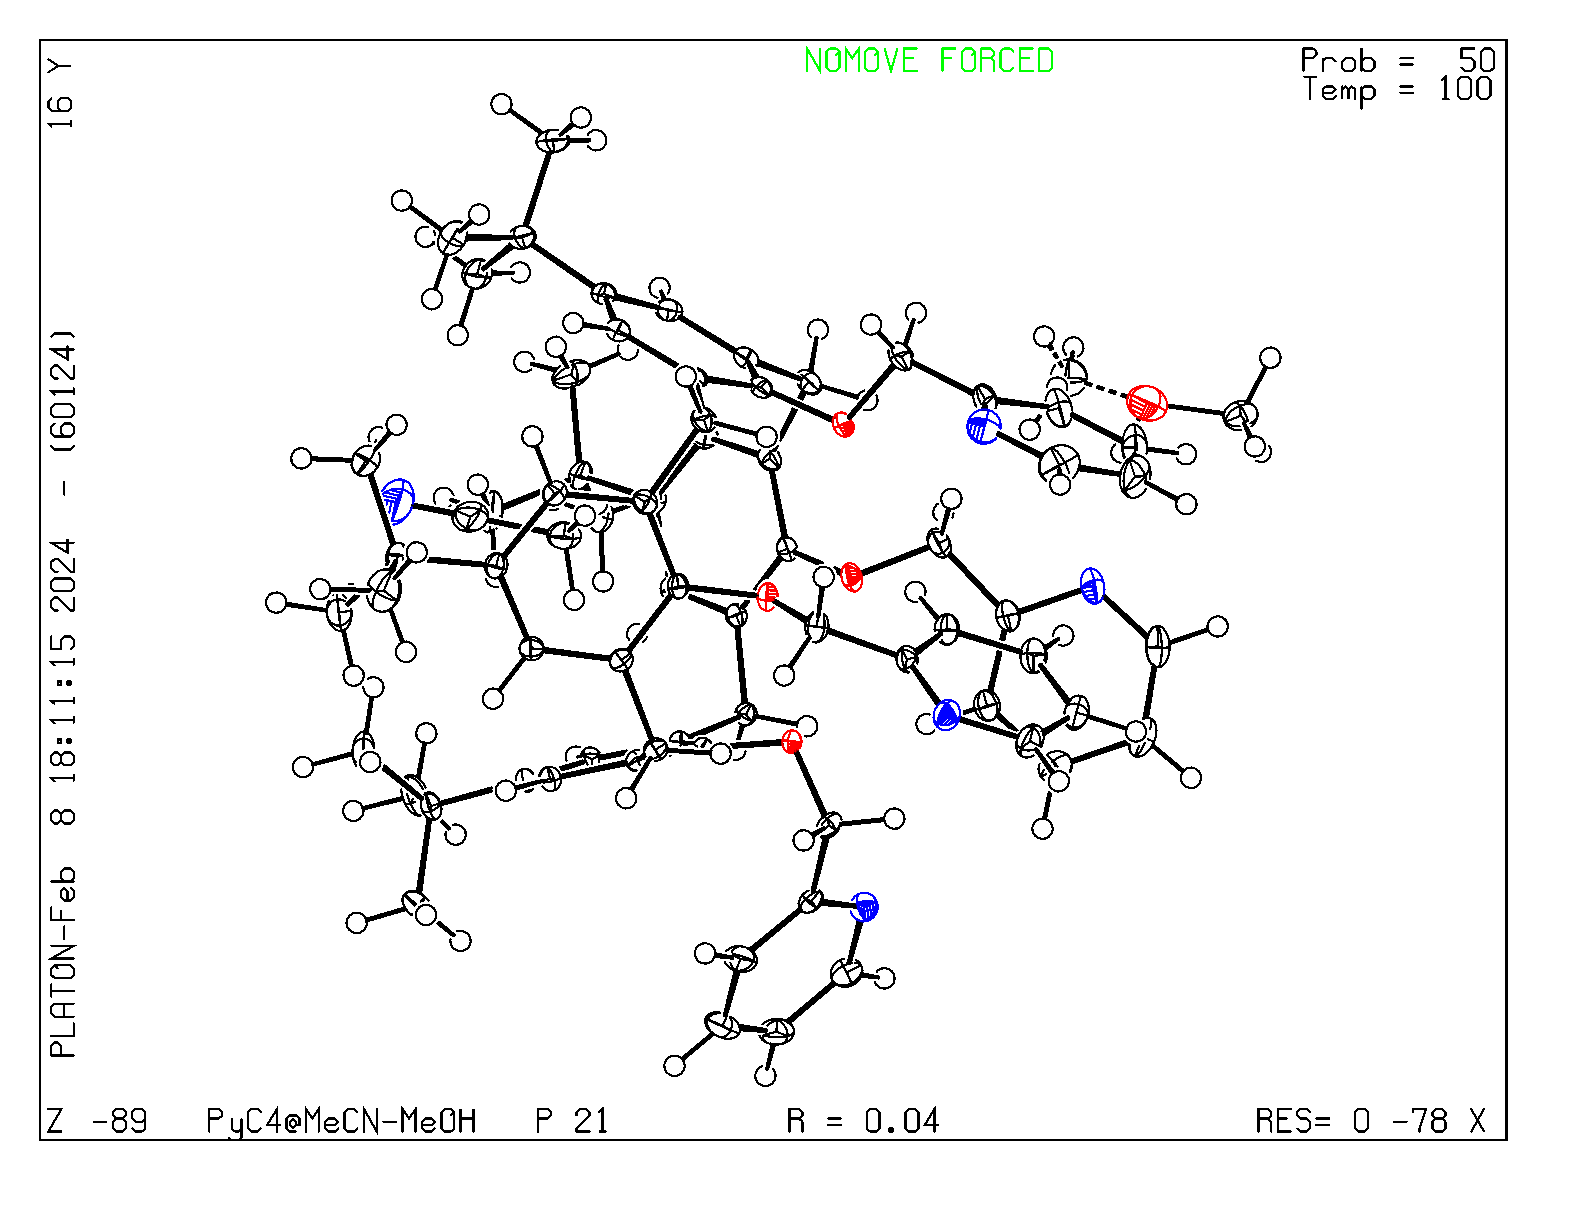


Figure S4. ORTEP drawing of the asymmetric unit for the **PyC4⸦MeCN-MeOH** crystal form.


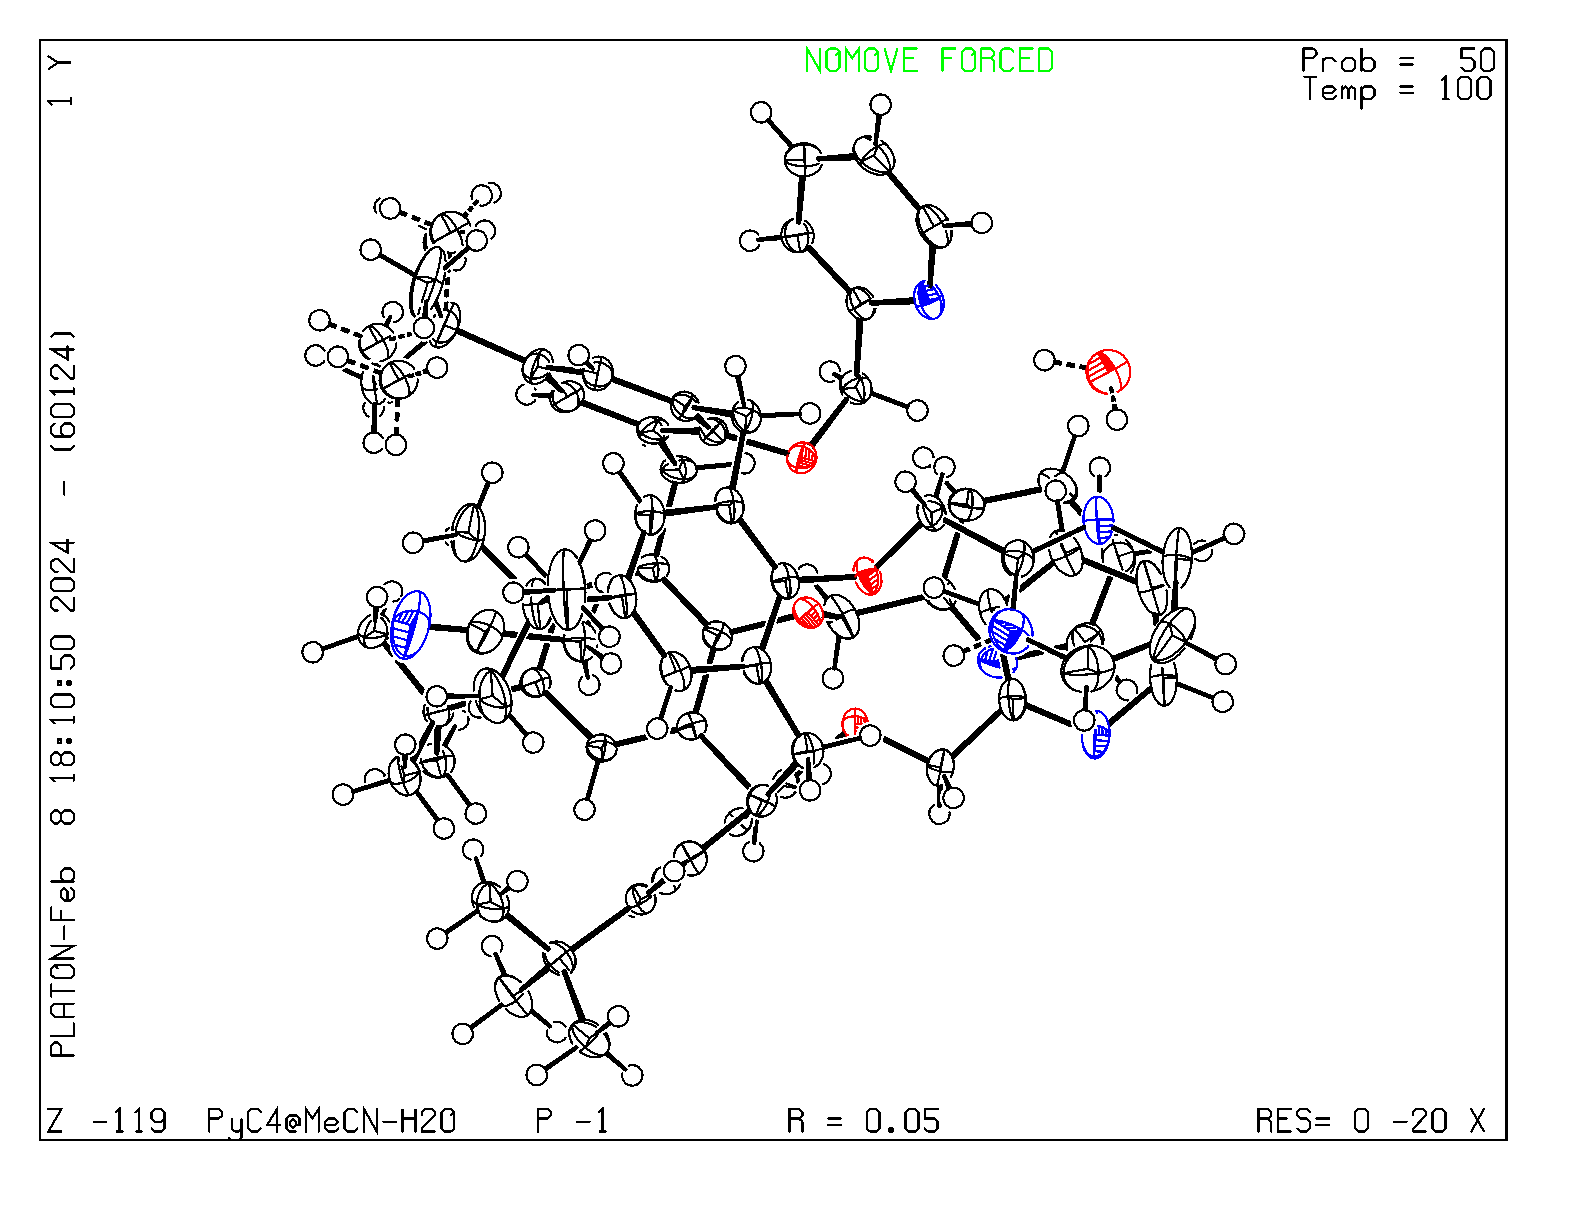


Figure S5. ORTEP drawing of the asymmetric unit for the **PyC4⸦MeCN-H2O** crystal form.


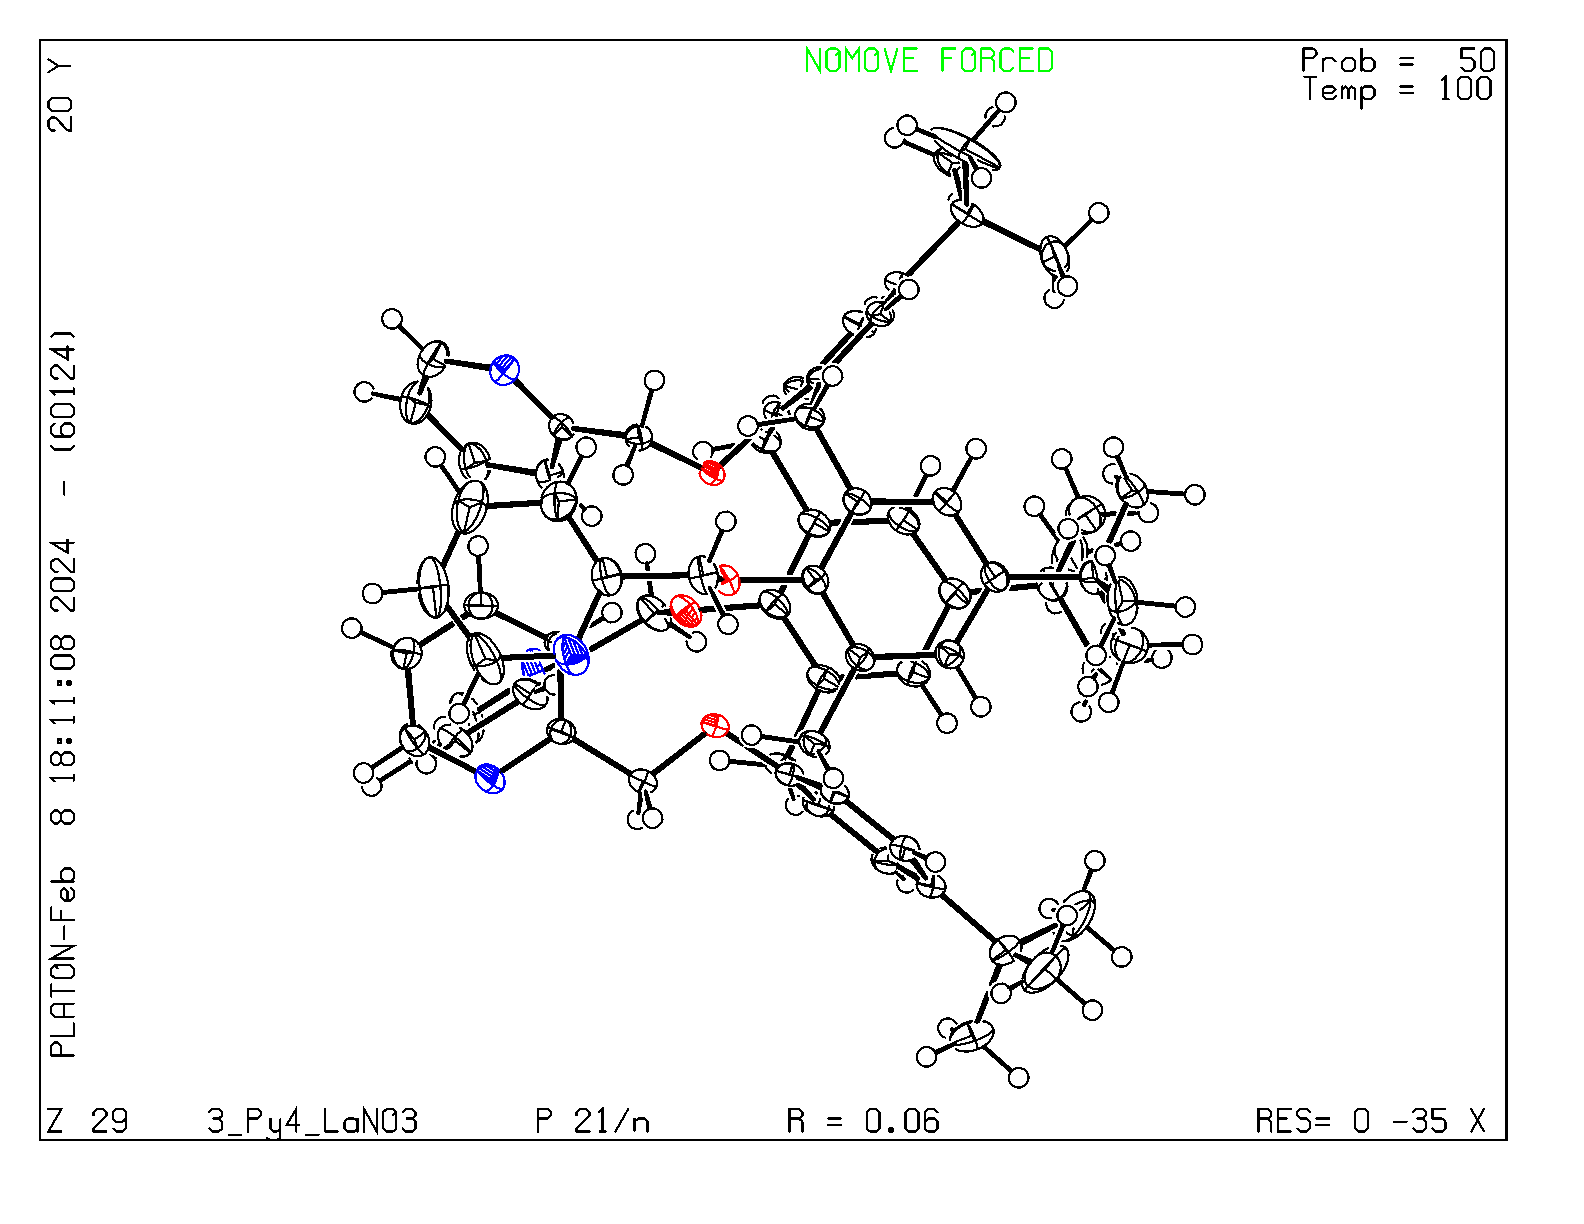


Figure S6. ORTEP drawing of the asymmetric unit for the **PyC4** crystal form.


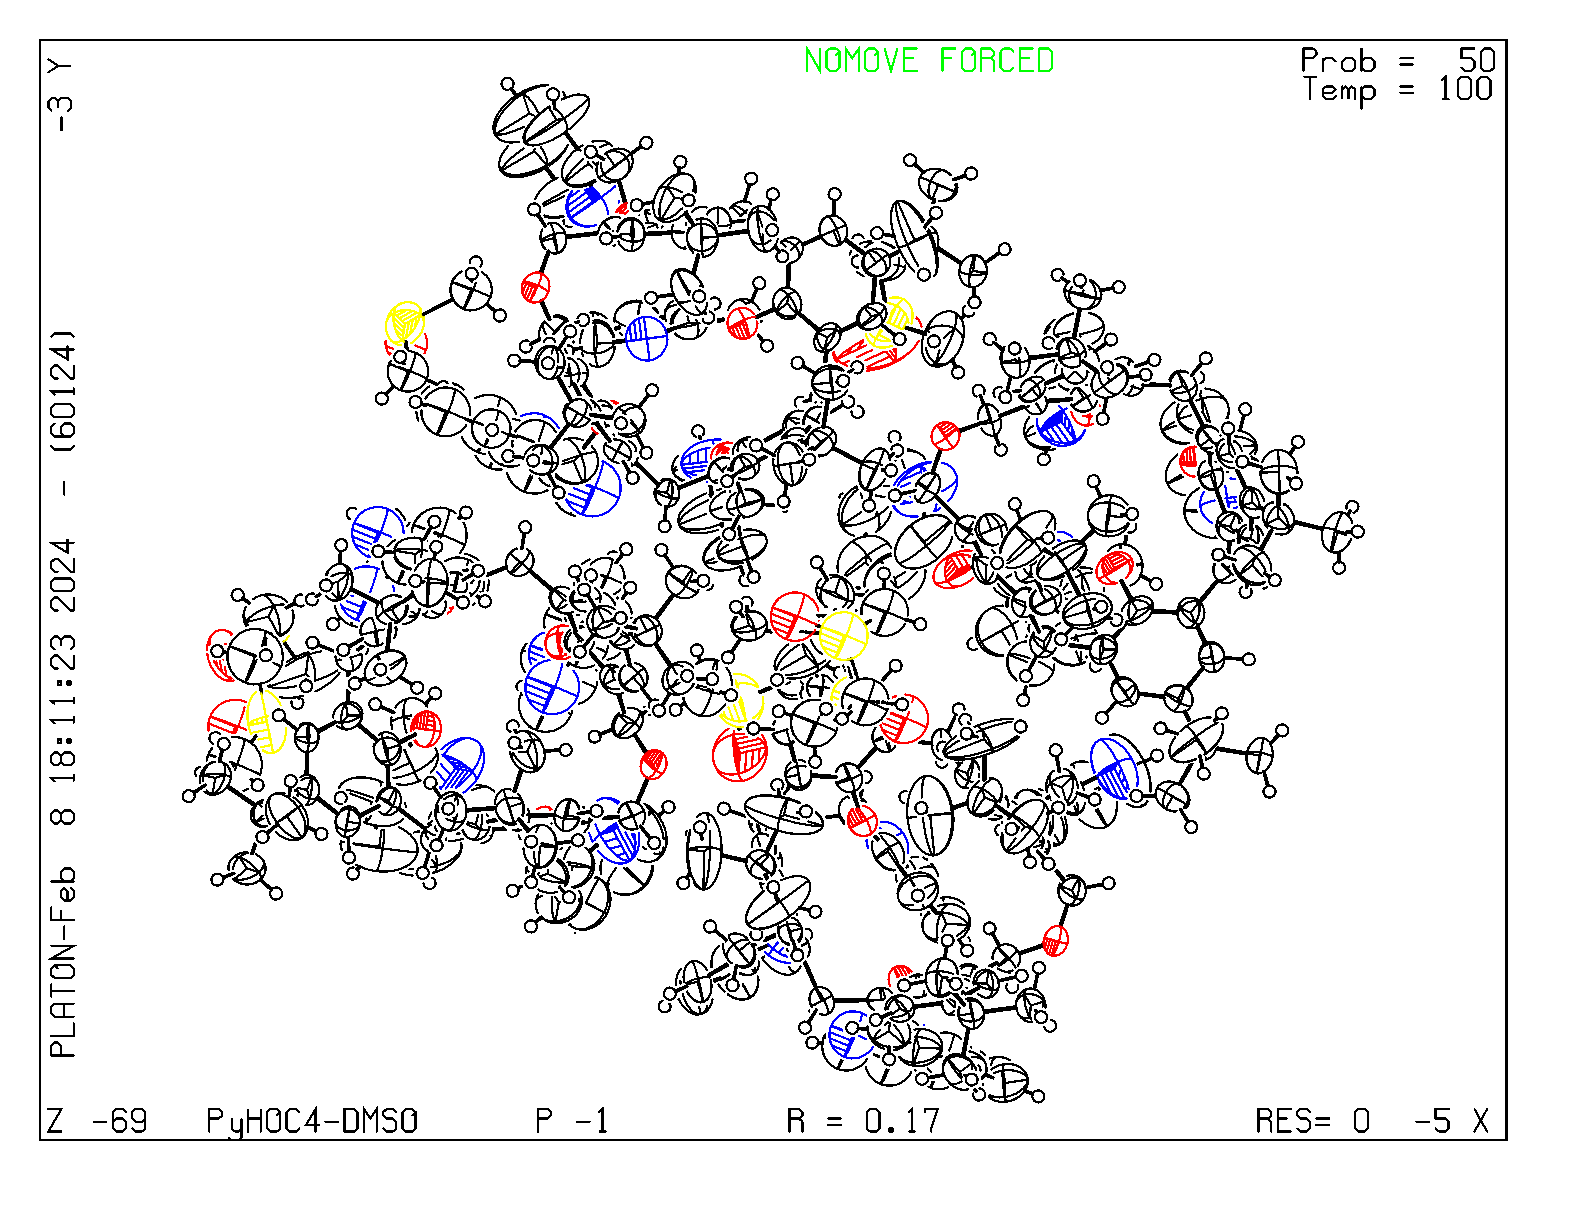


Figure S7. ORTEP drawing of the asymmetric unit for the **PyHOC4-DMSO** crystal form.


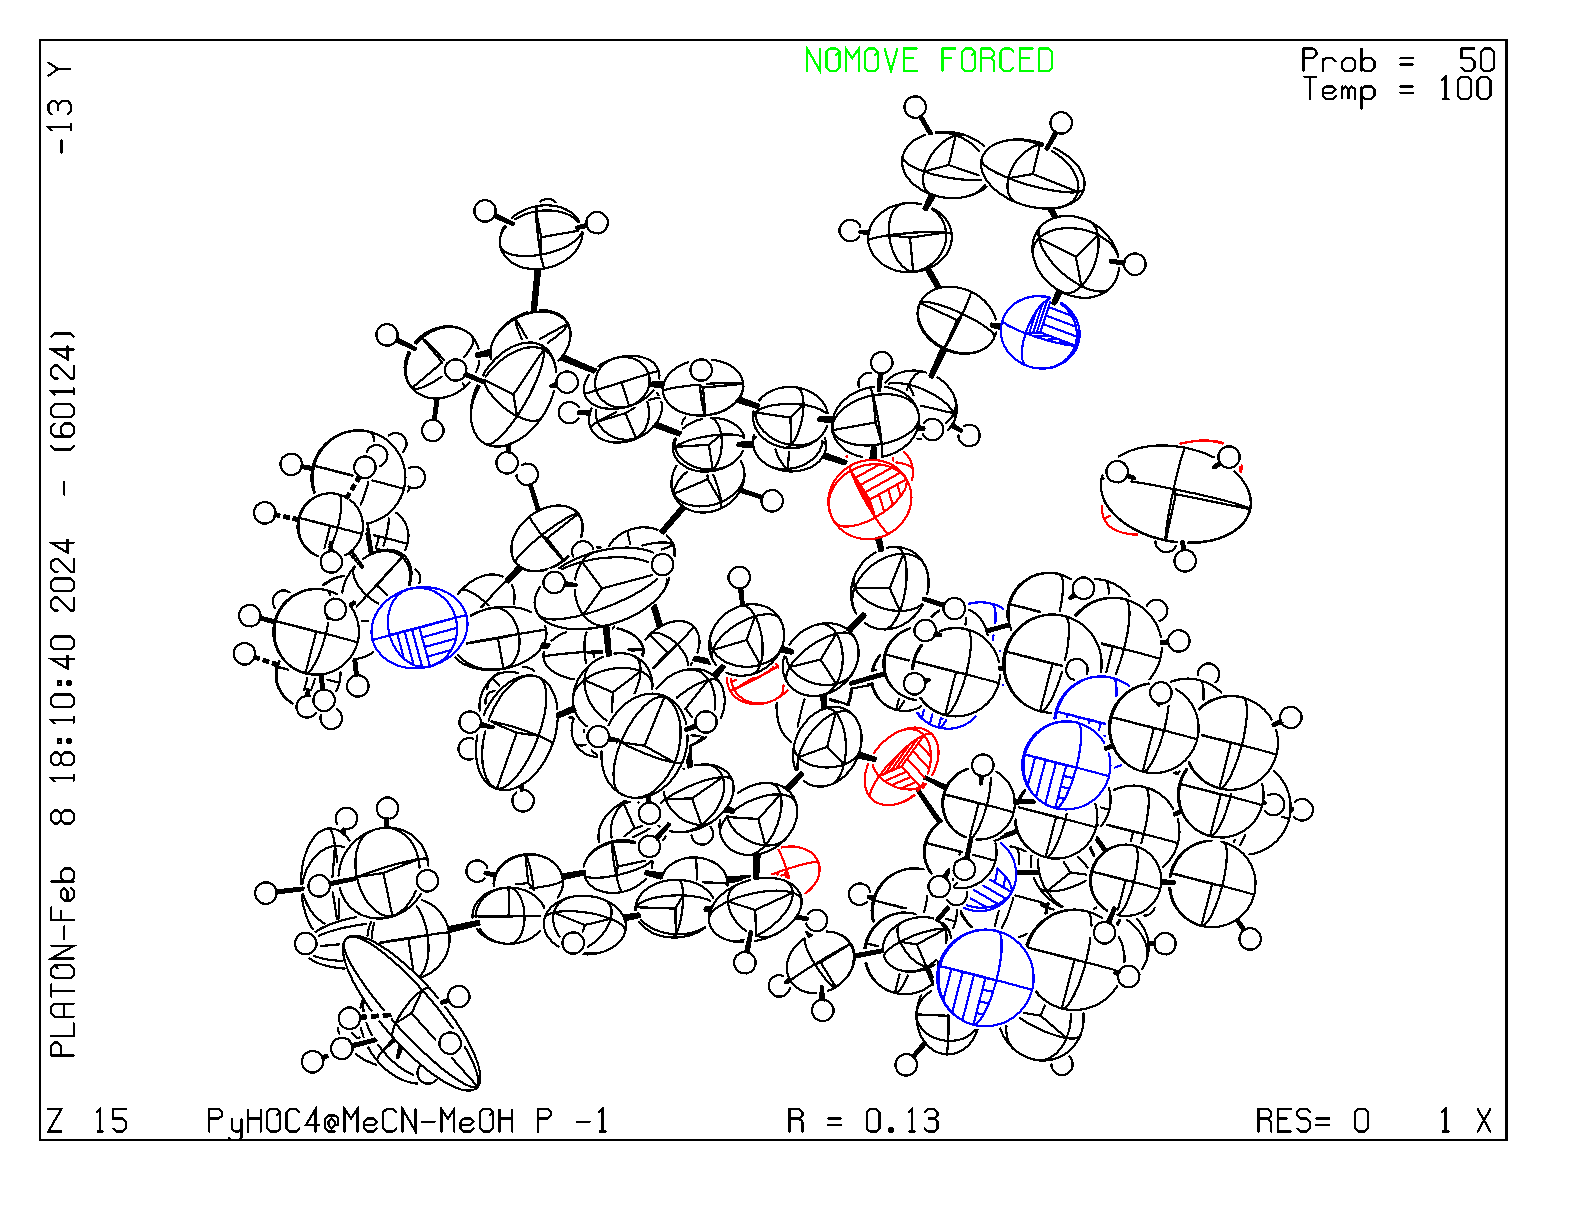


Figure S8. ORTEP drawing of the asymmetric unit for the **PyHOC4⸦MeCN-MeOH** crystal form.


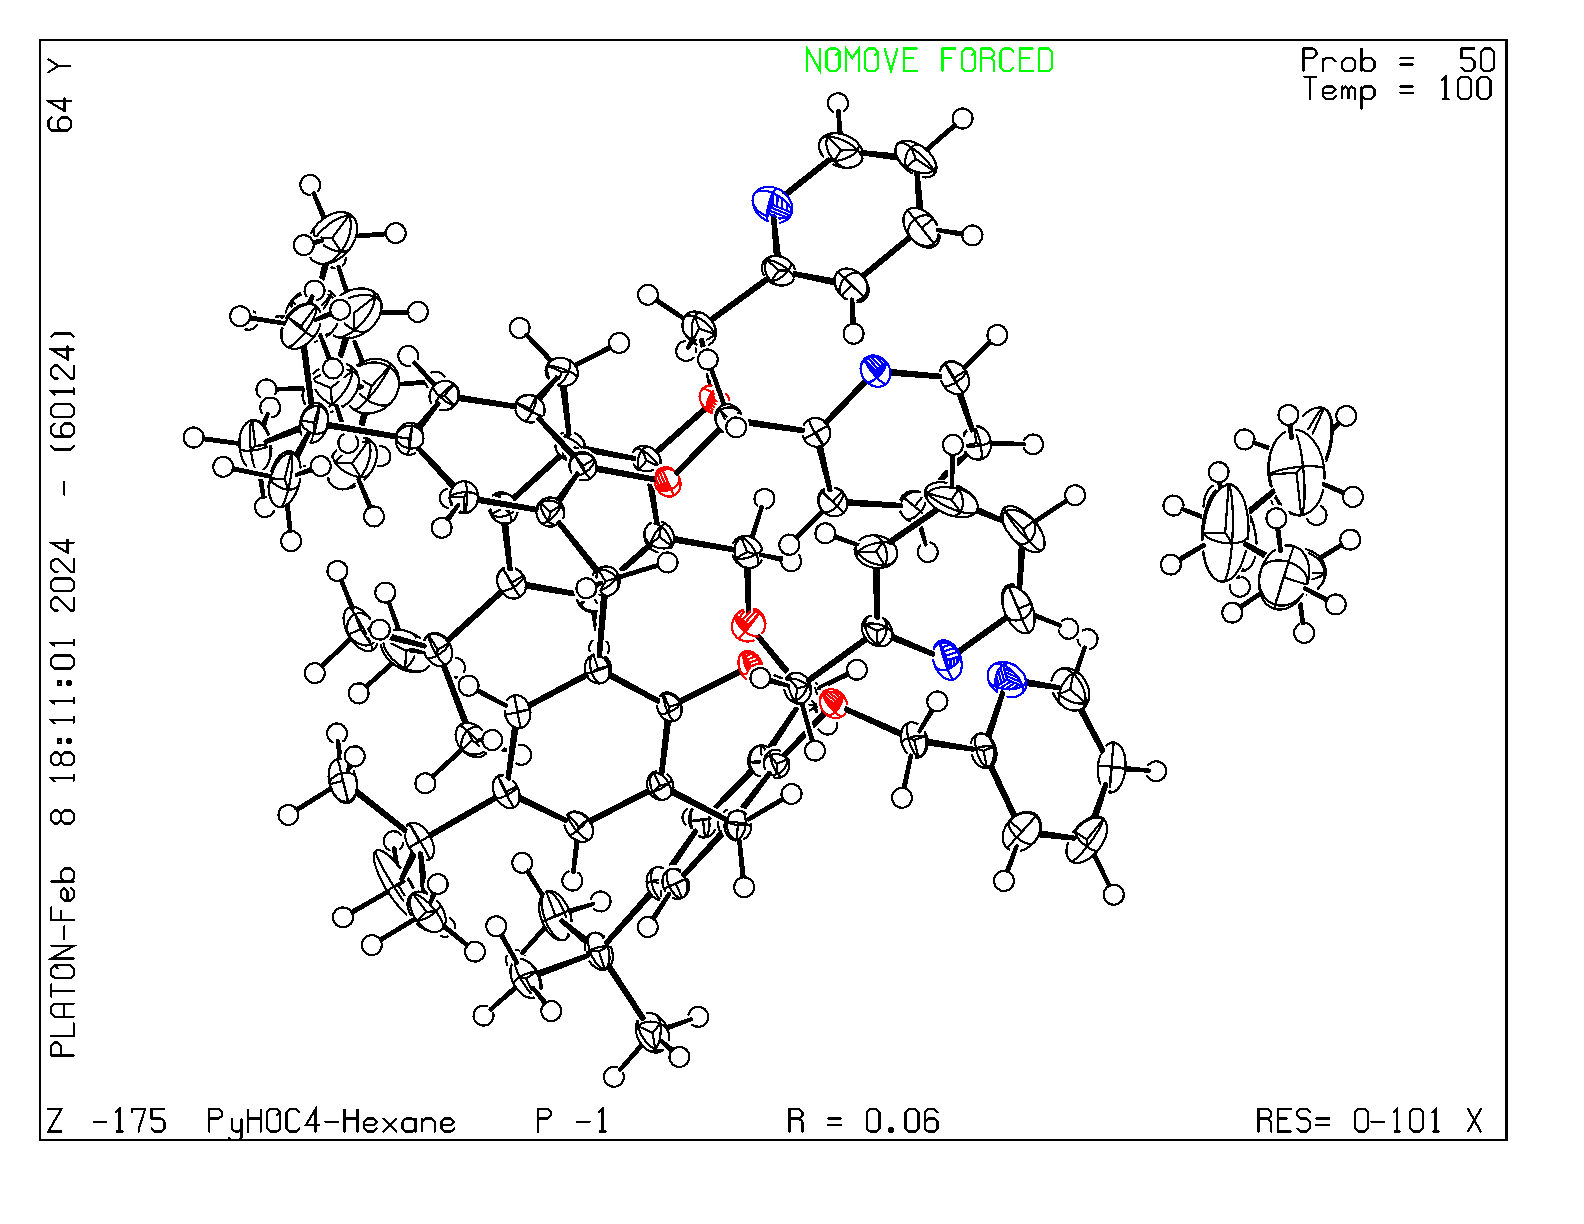


Figure S9. ORTEP drawing of the asymmetric unit for the **PyHOC4-Hexane** crystal form.


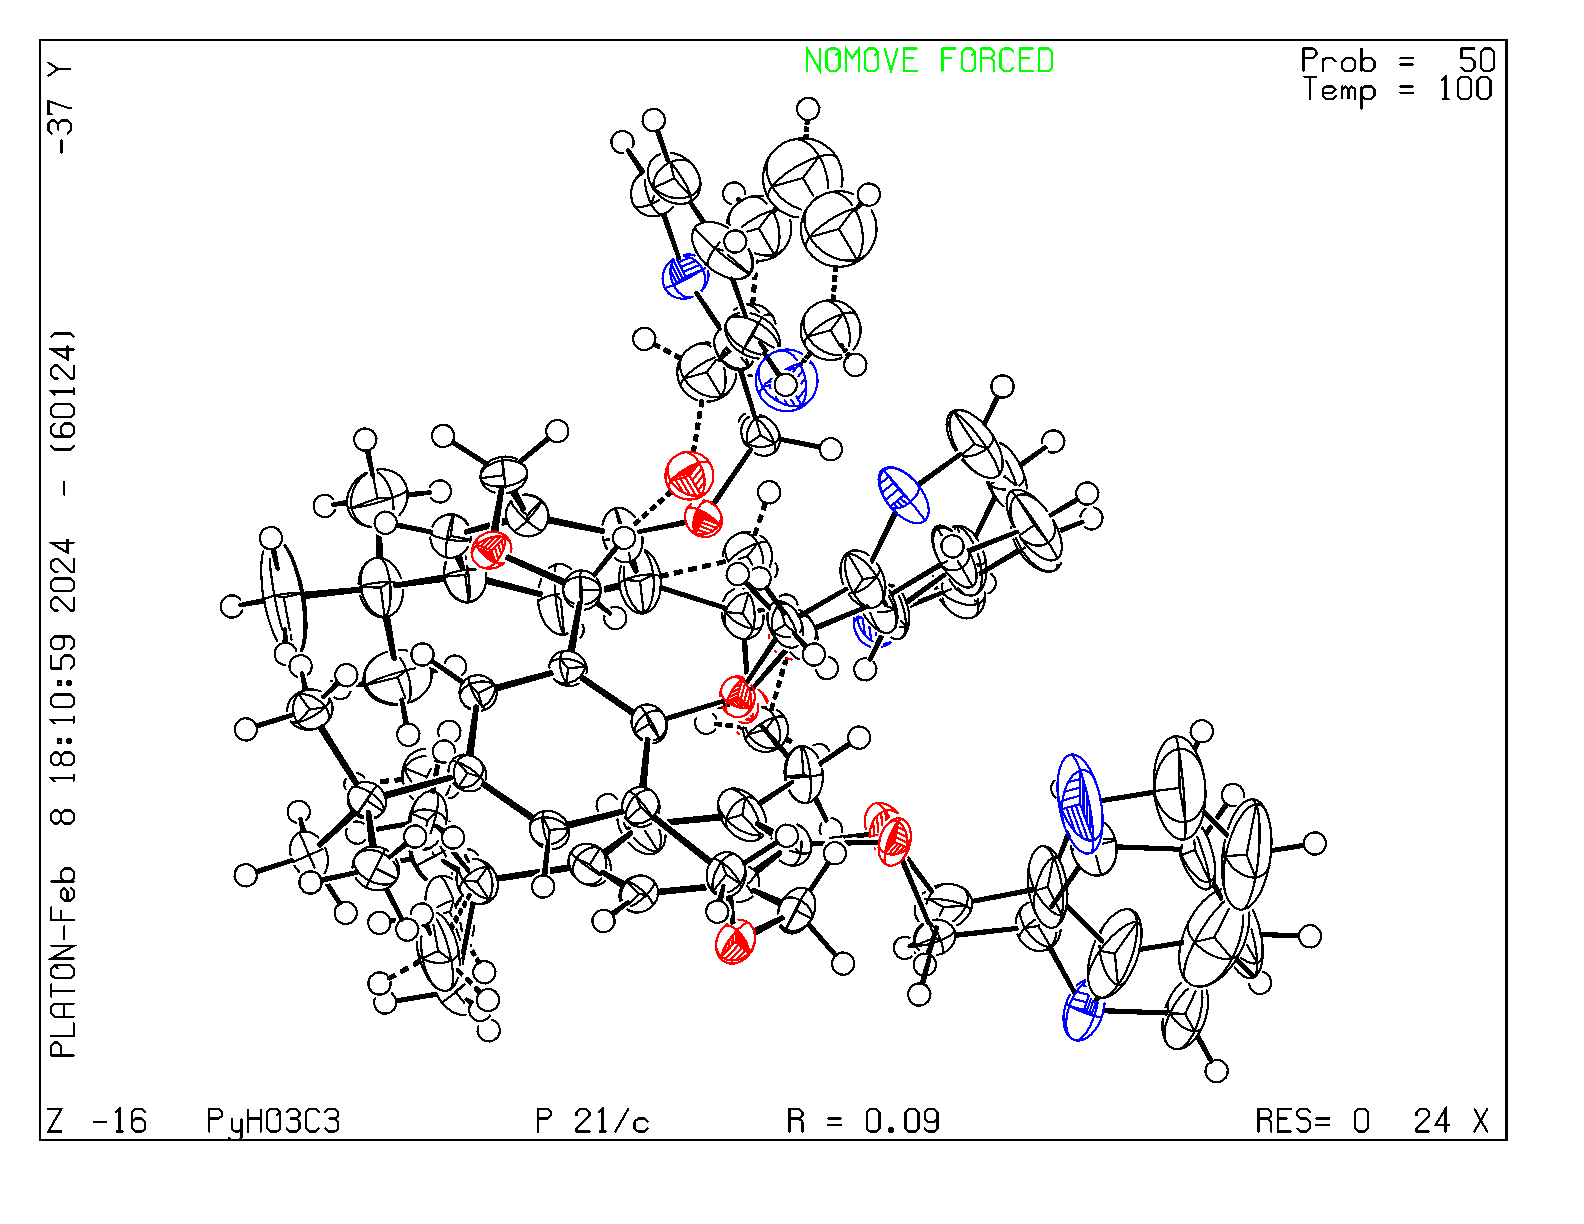


Figure S10. ORTEP drawing of the asymmetric unit for the **PyHO3C3** crystal form.


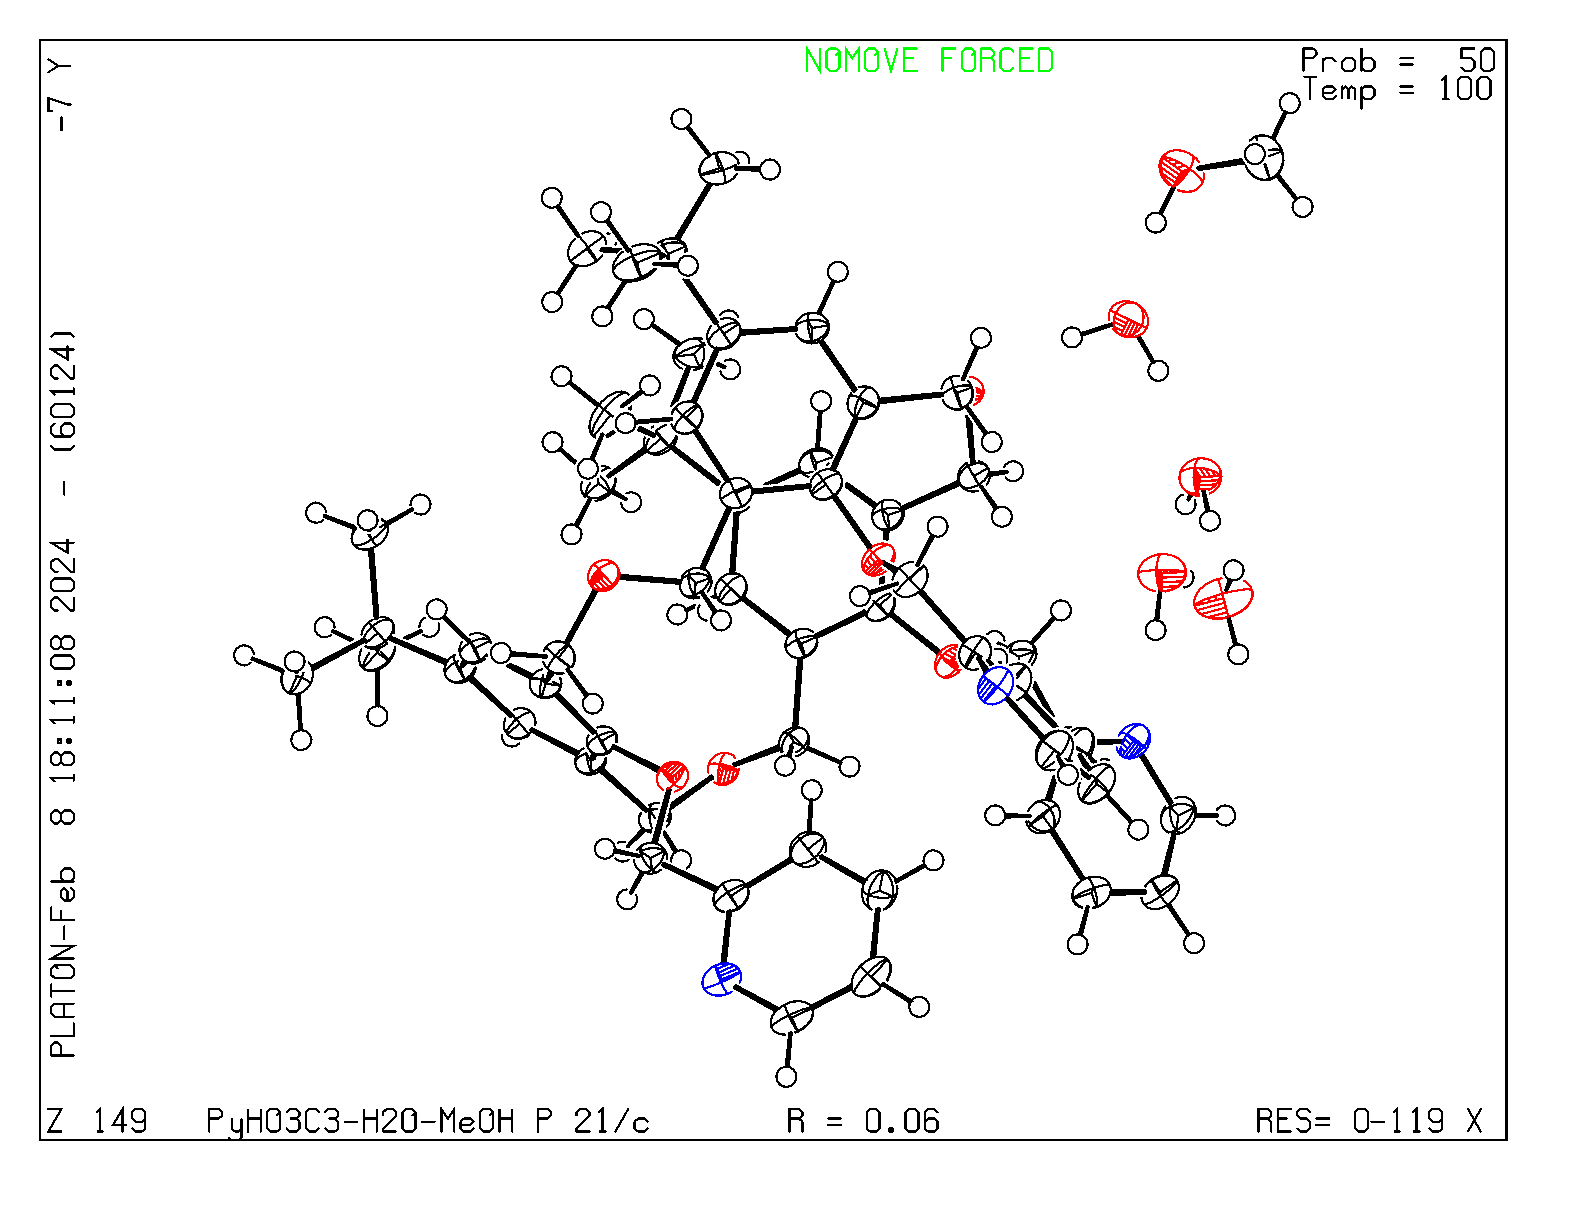


Figure S11. ORTEP drawing of the asymmetric unit for the **PyHO3C3-H2O-MeOH** crystal form.
